# Supplementary material
Source: MDPI journal article supplement (https://www.mdpi.com/2073-4344/13/4/665)
Supplement: s1 [file s1 › catalysts-2280604-supplementary.pdf]

## Supplementary Materials

### Contents

|                                                                                                                              |    |
|------------------------------------------------------------------------------------------------------------------------------|----|
| 1. Experimental Section .....                                                                                                | 3  |
| 1.1 Synthesis and Characterization of 2a.....                                                                                | 3  |
| 1.2 Synthesis and Characterization of 2b.....                                                                                | 3  |
| 1.3 Preparation of Ligand 3a <sup>1</sup> .....                                                                              | 4  |
| 1.4 Preparation of Ligand 3b.....                                                                                            | 4  |
| 1.5 Preparation of Manganese Complex 4a.....                                                                                 | 4  |
| 1.6 Preparation of Manganese Complex 4b .....                                                                                | 4  |
| 1.7 Preparation of Manganese Complex 5a.....                                                                                 | 5  |
| 1.8 Preparation of Manganese Complex 5b .....                                                                                | 5  |
| 1.9 General Procedure for Catalytic hydrosilylation.....                                                                     | 5  |
| 2. NMR Spectra of Selected Hydrosilylation Reactions.....                                                                    | 7  |
| Figure S1. <sup>1</sup> H NMR of the reaction of benzaldehyde with PhSiH <sub>3</sub> (Table 1, entry 1) .....               | 7  |
| Figure S2. <sup>1</sup> H NMR of the reaction of <i>p</i> -Br benzaldehyde with PhSiH <sub>3</sub> (Table 2, entry 2).....   | 8  |
| Figure S3. <sup>1</sup> H NMR of the reaction of cinnamaldehyde with PhSiH <sub>3</sub> (Table 2, entry 10) .....            | 8  |
| Figure S4. <sup>1</sup> H NMR of the reaction of acetophenone with PhSiH <sub>3</sub> (Table 2, entry 5).....                | 9  |
| Figure S5. <sup>1</sup> H NMR of the reaction of <i>p</i> -MeO acetophenone with PhSiH <sub>3</sub> (Table 2, entry 7) ..... | 9  |
| 3. Table S1: Comparison of Catalytic Activity of Selective Mn Complexes in Scheme 1 .....                                    | 10 |
| 4. References .....                                                                                                          | 10 |

## 1. Experimental Section

**General.** All the substrates and reagents were obtained commercially and were degasified and dried over molecular sieves prior to the reaction. The  $^1\text{H}$  and  $^{13}\text{C}$  NMR spectra were recorded on a Bruker AVANCE 500 or AVANCE NEO 400 NMR spectrometer and referenced to the residue peaks in  $\text{CDCl}_3$  (7.26),  $\text{CD}_3\text{CN}$  (1.94), or  $\text{C}_6\text{D}_6$  (7.16). High resolution mass spectrometry (HRMS) was performed using high-resolution time of flight G1969A instrumentation (Agilent, Santa Clara, CA, USA). UV-vis measurement was performed on a PerkinElmer Lambda 35 spectrophotometer.

### 1.1 Synthesis and Characterization of **2a**<sup>[77]</sup>

Ethylenediamine (55.1 mg, 0.917 mmol) in 30 mL of methanol was added dropwise to a stirred solution of salicylaldehyde (224 mg, 1.83 mmol) in 10 mL of methanol at RT. The reaction mixture was stirred for 5 min and sodium borohydride (693 mg, 1.83 mmol) was added portionwise within 10 min. After it became colorless, the mixture was washed with distilled  $\text{H}_2\text{O}$  and extracted with dichloromethane. The organic phase was collected and dried over anhydrous  $\text{Na}_2\text{SO}_4$ , and the solvent was removed in a rotavapor. Compound **2a** was obtained as a white solid, and the yield was 244 mg (98%).  $^1\text{H}$  NMR ( $\text{CDCl}_3$ , 500 MHz)  $\delta$  2.77 (s, 4H), 3.93 (s, 4H), 6.72 (td, 2H), 6.77 (d, 2H), 6.91 (d, 2H), 7.11 (td, 2H);  $^{13}\text{C}$  NMR ( $\text{CDCl}_3$ , 125 MHz)  $\delta$  47.8 ( $\text{CH}_2$ ), 52.6 ( $\text{CH}_2$ ), 116.4, 119.2, 122.1, 128.4, 128.9, 157.9.

### 1.2 Synthesis and Characterization of **2b**<sup>[88]</sup>

To a stirred solution of 3,5-di-*t*-butyl salicylaldehyde (424 mg, 1.81 mmol) in 10 mL of methanol was slowly added a solution of ethylenediamine (54.3 mg, 0.904 mmol) in 30 mL of methanol. The mixture was refluxed for two hours and then filtered. A yellow solid was obtained as the product. The yield was 440 mg (99%).  $^1\text{H}$  NMR ( $\text{CDCl}_3$ , 500 MHz):  $\delta$  1.28 (s, 18H), 1.43 (s, 18H), 3.92 (m, 4H), 7.06 (d, 2H), 7.36 (d, 2H), 8.38 (s, 2H), 13.65 (s, 2H);  $^{13}\text{C}$  NMR ( $\text{CDCl}_3$ , 125 MHz):  $\delta$  24.4 ( $\text{C}(\text{CH}_3)_3$ ), 29.5 ( $\text{C}(\text{CH}_3)_3$ ), 33.3 ( $\text{C}(\text{CH}_3)_3$ ), 34.1 ( $\text{C}(\text{CH}_3)_3$ ), 35.0 ( $\text{CH}_2$ ), 117.9 (Ar-C), 126.1 (Ar-C), 126.8 (Ar-C), 136.4 (Ar-C), 139.9 (Ar-C), 158.1 (Ar-C), 165.9 ( $\text{CH}=\text{N}$ ). In the second step, the compound obtained in the first step (541 mg, 1.09 mmol) was dissolved in 12 mL of THF. Then, sodium borohydride (247 mg, 60 mmol) was added, and the reaction mixture was refluxed for three hours. When the mixture was colorless, it was washed with 100 mL of water and extracted with dichloromethane. The organic phases were dried over anhydrous  $\text{Na}_2\text{SO}_4$ , and the solvents were removed under the vacuum to obtain **2b** as a white solid. The yield was 528 mg (97%).  $^1\text{H}$  NMR ( $\text{CDCl}_3$ , 500 MHz)  $\delta$  1.28 (s, 18H), 1.41 (s, 18H), 2.87 (s, 4H), 3.96 (s, 4H), 6.85 (d, 2H), 7.22 (d, 2H), 10.79 (s, 2H);  $^{13}\text{C}$  NMR ( $\text{CDCl}_3$ , 125 MHz)  $\delta$  29.6 ( $\text{CH}_3$ ), 31.7 ( $\text{CH}_3$ ), 34.1 ( $\text{CMe}_3$ ), 34.9 ( $\text{CMe}_3$ ), 48.0 ( $\text{CH}_2$ ), 53.5 ( $\text{CH}_2$ ), 121.7, 123.1, 123.2, 136.0, 140.6, 154.4.

### 1.3 Preparation of Ligand 3a<sup>1771</sup>

Compound **2a** (325 mg, 1.19 mmol) was dissolved in acetonitrile (27 mL) and acetic acid (4 mL) in a round bottom flask. Then, formaldehyde (0.886 mL, 11.9 mmol, 37% in water) was added. After 20 min of stirring at room temperature, sodium borohydride (225 mg, 5.95 mmol) was added to the mixture and stirred for an additional 24 h at RT. Acetonitrile was evaporated in a rotavapor, and the remaining residue was hydrolyzed with 2 N NaOH. The product was extracted using dichloromethane. The solvent was removed to obtain **3a** as a white powder. The yield was 510 mg (89%); <sup>1</sup>H NMR (CDCl<sub>3</sub>, 500 MHz) δ 2.24(s, 6H), 2.67 (s, 4H), 3.70 (s, 4H), 6.78 (td, 2H), 6.84 (dd, 2H), 6.96 (dd, 2H), 7.18, 10.75 (s, 2H) (td, 2H); <sup>13</sup>C NMR (CDCl<sub>3</sub>, 125 MHz) δ 41.7 (CH<sub>3</sub>), 54.1 (CH<sub>2</sub>), 61.8 (CH<sub>2</sub>), 116.2, 119.1, 121.6, 128.5, 128.9, 157.8.

### 1.4 Preparation of Ligand 3b<sup>1761</sup>

Ligand **3b** was prepared by a similar procedure as ligand **3a**. Ligand **2b** (541 mg, 1.09 mmol) was added to a flask that contained acetonitrile (27 mL) and acetic acid (4 mL). After 5 min, formaldehyde (0.812 mL, 10.9 mmol) was added. The reaction was stirred at RT for 10 min, and sodium borohydride (206 mg, 5.45 mmol) was added. Then, the reaction was stirred at RT for 24 h. Acetonitrile was removed under vacuum, the mixture was hydrolyzed with 2N NaOH, and the product was extracted with dichloromethane. The yield was 542 mg (95%). M. p. 142-147 °C; <sup>1</sup>H NMR (CDCl<sub>3</sub>, 500 MHz) δ 1.27 (s, 18H), 1.39 (s, 18H), 2.26 (s, 6H), 2.63 (s, 4H), 3.66 (s, 4H), 6.80 (d, 2H), 7.20 (d, 2H), 10.68 (b, 2H); <sup>13</sup>C NMR (CDCl<sub>3</sub>, 125 MHz) δ 29.6 (CH<sub>3</sub>), 31.7 (CH<sub>3</sub>), 34.1 (C(CH<sub>3</sub>)<sub>3</sub>), 34.8 (C(CH<sub>3</sub>)<sub>3</sub>), 41.6 (NCH<sub>3</sub>), 53.8 (NCH<sub>2</sub>), 62.7 (NCH<sub>2</sub>), 121.0, 123.0, 123.3, 135.6, 140.5, 154.2.

### 1.5 Preparation of Manganese Complex 4a

Ligand **3a** (121mg, 10 mmol) was dissolved in ethanol (70 mL), and then Mn(Oac)<sub>2</sub>·4H<sub>2</sub>O (182 mg, 20 mmol) was added to the reaction mixture. The resulting mixture was refluxed for 3 hours, and LiCl (47.4 mg, 30 mmol) was added. This solution was refluxed for an additional two hours. The solvent was removed under a vacuum, and dichloromethane was added. The mixture was washed with brine and H<sub>2</sub>O solutions, then dried with an anhydrous Na<sub>2</sub>SO<sub>4</sub>. The solvent was removed under a vacuum to obtain **4a** as a brown solid. The yield was 115 mg (80 %); m. p. 178 -185 °C (decomp.); FT-IR 3362, 1554, 1353, 1263, 1184, 1034, 943, 756, 671, 756 cm<sup>-1</sup>. UV-vis in CH<sub>3</sub>CN [nm, ε (M<sup>-1</sup> cm<sup>-1</sup>): 325 (1.70 x 10<sup>4</sup>), 275 (7.84 x 10<sup>4</sup>), 220 (1.70 x 10<sup>5</sup>).

### 1.6 Preparation of Manganese Complex 4b

The manganese complex **4b** was prepared by a similar procedure to manganese complex **4a**. Ligand **3b** (231 mg, 0.440 mmol) was dissolved in ethanol (100 mL) with constant stirring at RT, then Mn(Oac)<sub>2</sub>·4H<sub>2</sub>O (215 mg, 0.880 mmol) was added to the mixture. The reaction mixture was refluxed for

three hours, and LiCl (55.9 mg, 1.32 mmol) was added. The mixture was then refluxed for an additional two hours. Ethanol was removed, and dichloromethane was added. The mixture was washed with brine and H<sub>2</sub>O. The organic phase was isolated, and the solvent was removed. The yield was 231 mg (86 %); mp 184-185 °C (decomp.); IR 2953, 2904, 2867, 1605, 1463, 1443, 1390, 1304, 1236, 1203, 1166, 1172, 1104, 1019, 979 cm<sup>-1</sup>. UV-vis in CH<sub>3</sub>CN [nm,  $\epsilon$  (M<sup>-1</sup> cm<sup>-1</sup>)]: 325 (5.83 x 10<sup>4</sup>), 285 (1.16 x 10<sup>5</sup>), 225 (2.04 x 10<sup>5</sup>).

### 1.7 Preparation of Manganese Complex 5a

In flask 1, compound **4a** (221 mg, 0.568 mmol) was dissolved in 10 mL of CH<sub>3</sub>CN. In flask 2, AgClO<sub>4</sub> (117 mg, 0.568 mmol) was dissolved in 2 mL of CH<sub>3</sub>CN. The mixture of flask 1 was added to flask 2 over a 5 min period. The precipitation of AgCl was observed immediately, and the mixture was stirred at RT for 16 hours. The mixture was then washed with CH<sub>3</sub>CN through a silica pad, and NaN<sub>3</sub> (111 mg, 1.71 mmol) was added to the filtrate. The filtrate was stirred at RT for 24 hours. Then, ethyl ether was added, and the solution mixture was washed with H<sub>2</sub>O three times. The organic phase was isolated and dried, and the solvent was evaporated under the vacuum to obtain **5a** as a brown solid. The yield was 135 mg (60%); m.p. 169-173 °C (decomp.); IR 2855, 2037 ( $\nu_{\text{N}_3}$ ), 1629, 1594, 1566, 1531, 1477, 1448, 1370, 1267, 1242, 1145, 1107, 1037, 1009, 966. UV-vis in CH<sub>3</sub>CN [nm,  $\epsilon$  (M<sup>-1</sup> cm<sup>-1</sup>)]: 460 (2.27 x 10<sup>4</sup>), 375 (5.45 x 10<sup>4</sup>), 340 (5.91 x 10<sup>4</sup>), 310 (9.09 x 10<sup>4</sup>), 260 (1.09 x 10<sup>5</sup>), 240 (1.45 x 10<sup>5</sup>).

### 1.8 Preparation of Manganese Complex 5b

It was prepared by a procedure similar to complex **5a**. Compound **4b** (343 mg, 0.561 mmol) in acetonitrile was added to the solution of AgClO<sub>4</sub> (116 mg, 0.561 mmol) in acetonitrile over 5 min. The mixture was stirred for 16 hours and filtered through silica with 20 mL of CN<sub>3</sub>CN. After that, NaN<sub>3</sub> (109 mg, 1.63 mmol) was added to the filtrate, and the mixture was stirred at RT for 24 h. The mixture was then diluted with ethyl ether (15 mL) and washed with H<sub>2</sub>O. The organic phase was isolated and dried, and the solvent was removed under a vacuum. The yield was 242 mg (70%); m.p. 183-184 °C (decomp.); IR 2956, 2904, 2866, 2050 ( $\nu_{\text{N}_3}$ ), 1612, 1534, 1474, 1467, 1443, 1390, 1360, 1303, 1234, 1202, 1165, 1103, 1018, 979 cm<sup>-1</sup>. UV-vis in CH<sub>3</sub>CN [nm,  $\epsilon$  (M<sup>-1</sup> cm<sup>-1</sup>)]: 475 (3.09 x 10<sup>4</sup>), 285 (7.32 x 10<sup>4</sup>), 240 (8.53 x 10<sup>4</sup>), 215 (3.41 x 10<sup>5</sup>), 225 (2.43 x 10<sup>4</sup>).

### 1.9 General Procedure for Catalytic hydrosilylation

In a typical procedure, manganese catalyst **5b** (2-3 mg, 0.5 mol%), the carbonyl substrate (~1 mmol, 1.0 equivalent), PhSiH<sub>3</sub> (1 equivalent), and a deuterated solvent (i.e. C<sub>6</sub>D<sub>6</sub>, 0.2-0.4 mL) were added to a J Young NMR tube. This was then heated in an oil bath set at ~120 °C and the reaction progress was monitored by <sup>1</sup>H NMR spectroscopy at preset time intervals. After the consumption of the carbonyl substrates was complete or nearly complete, the reaction mixture was transferred to a round bottom flask while being washed with diethylether (3-5 mL). After the addition of aqueous HCl (1 M) to the flask, the mixture was stirred for 1-2 h. After hydrolysis, the organic layer was extracted with diethylether and subjected to column chromatography using silica with hexane-EtOAc as an eluent. The

resultant products were characterized by  $^1\text{H}$  NMR in  $\text{CDCl}_3$  and confirmed by comparison with the literature data or authentic samples.

The gram scale hydrosilylation was carried out as follows: manganese catalyst **5b** (30.4 mg, 0.5 mol%), PhCHO (992  $\mu\text{L}$ , 9.82 mmol, 1.0 equivalent), and PhSiH<sub>3</sub> (1.21 mL, 9.81 mmol, 1 equivalent) were added to a vial and sealed, then it was heated in an oil bath set at  $\sim 120^\circ\text{C}$  and the reaction progress was monitored by  $^1\text{H}$  NMR spectroscopy at preset time intervals. After completion of the reaction, the mixture was hydrolyzed and purified as described above. Yield: 80%.

**Benzyl alcohol (Table 2, entry 1).**<sup>[89]</sup>  $^1\text{H}$  NMR (500 MHz,  $\text{CDCl}_3$ , 298 K,  $\delta$ ): 4.68 (s, 2H,  $\text{OCH}_2$ ), 7.19 (m, 2H, *Ph*), 7.35-7.40 (m, 3H, *Ph*).

***p*-Bromobenzyl alcohol (Table 2, entry 2).**<sup>[89]</sup>  $^1\text{H}$  NMR (500 MHz,  $\text{CDCl}_3$ , 298 K,  $\delta$ ): 4.55 (s, 2H,  $\text{OCH}_2$ ), 7.22 (m, 2H, *Ph*), 7.37 (m, 2H, *Ph*).

***p*-Nitrobenzyl alcohol (Table 2, entry 3).**<sup>[89]</sup>  $^1\text{H}$  NMR (500 MHz,  $\text{CDCl}_3$ , 298 K,  $\delta$ ): 4.81 (s, 2H,  $\text{OCH}_2$ ), 7.45 (m, 2H, *Ph*), 8.09 (m, 2H, *Ph*).

***p*-Methoxybenzyl alcohol (Table 2, entry 4).**<sup>[89]</sup>  $^1\text{H}$  NMR (500 MHz,  $\text{CDCl}_3$ , 298 K,  $\delta$ ): 3.52 (s, 3H,  $\text{OCH}_3$ ), 4.61 (s, 2H,  $\text{OCH}_2$ ), 6.82 (m, 2H, *Ph*), 7.11 (m, 2H, *Ph*).

**1-Phenylethanol (Table 2, entry 5).**<sup>[90]</sup>  $^1\text{H}$  NMR (500 MHz,  $\text{CDCl}_3$ , 298 K,  $\delta$ ): 1.42 (d, 3H,  $\text{CH}_3$ ), 4.84 (q, 1H,  $\text{OCH}$ ), 7.18 (d, 2H, *Ph*), 7.20 (m, 3H, *Ph*).

**1-(4-Nitrophenyl)ethanol (Table 2, entry 6).**<sup>[90]</sup>  $^1\text{H}$  NMR (500 MHz,  $\text{CDCl}_3$ , 298 K,  $\delta$ ): 1.49 (d, 3H,  $\text{CH}_3$ ), 4.97 (q, 1H,  $\text{OCH}$ ), 7.51 (d, 2H, *Ph*), 8.04 (d, 2H, *Ph*).

**1-(4-Methoxyphenyl)ethanol (Table 2, entry 7).**<sup>[89]</sup>  $^1\text{H}$  NMR (500 MHz,  $\text{CDCl}_3$ , 298 K,  $\delta$ ): 1.50 (d, 3H,  $\text{CH}_3$ ), 3.60 (s, 3H,  $\text{OCH}_3$ ), 4.87 (q, 1H,  $\text{OCH}$ ), 6.88 (d, 2H, *Ph*), 7.27 (d, 2H, *Ph*).

**$\alpha$ -Cyclopropylbenzylalcohol (Table 2, entry 8).**<sup>[89]</sup>  $^1\text{H}$  NMR (500 MHz,  $\text{CDCl}_3$ , 298 K,  $\delta$ ): 0.35-0.46 (m, 4H, cyclopropyl  $2\text{CH}_2$ ), 0.56 (m, 1H, cyclopropyl *CH*), 4.02 (m, 1H,  $\text{OCH}$ ), 7.20 (m, 1H, *Ph*), 7.31 (m, 2H, *Ph*), 7.48 (m, 2H, *Ph*).

**Cinnamyl alcohol (Table 2, entry 9).**<sup>[91]</sup>  $^1\text{H}$  NMR (500 MHz,  $\text{CDCl}_3$ , 298 K,  $\delta$ ): 4.12 (s, 2H,  $\text{OCH}_2$ ), 6.20 (m, 1H,  $-\text{CH}=\text{CHPh}$ ), 6.34 (m, 1H,  $-\text{CH}=\text{CHPh}$ ), 7.01 (m, 2H, *Ph*), 7.08-7.17 (m, 3H, *Ph*).

**2-Pentanol (Table 2, entry 10).**<sup>[91]</sup>  $^1\text{H}$  NMR (500 MHz,  $\text{CDCl}_3$ , 298 K,  $\delta$ ): 0.91 (t, 3H,  $\text{CH}_3$ ), 1.17(d, 3H,  $\text{OCHCH}_3$ ), 1.39 (m, 4H,  $\text{CH}_2$ ), 3.80 (m, 1H,  $\text{OCH}$ ).

**Cyclohexanol (Table 2, entry 11).**<sup>[92]</sup> <sup>1</sup>H NMR (500 MHz, CDCl<sub>3</sub>, 298 K, δ): 1.21 (m, 2H, CH<sub>2</sub>), 1.40 (m, 2H, CH<sub>2</sub>), 1.49 (m, 2H, CH<sub>2</sub>), 1.71 (m, 2H, CH<sub>2</sub>), 1.83 (m, 2H, CH<sub>2</sub>), 3.60 (m, 1H, OCH).

## 2. NMR Spectra of Selected Hydrosilylation Reactions

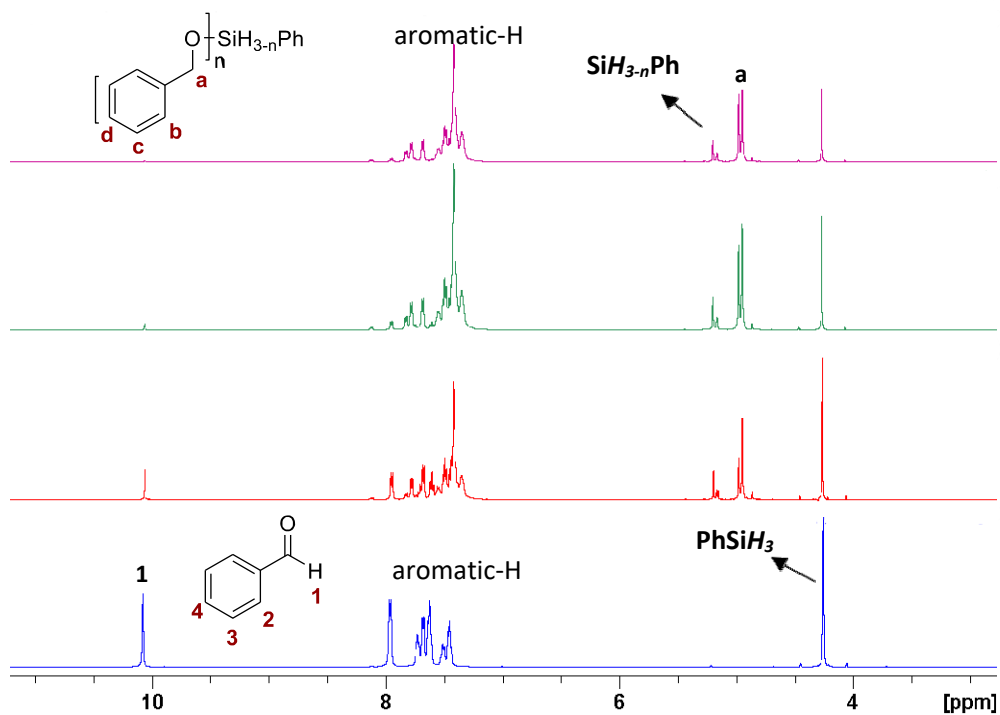

**Figure S1.** <sup>1</sup>H NMR of the reaction of benzaldehyde with  $\text{PhSiH}_3$  (Table 1, entry 1)

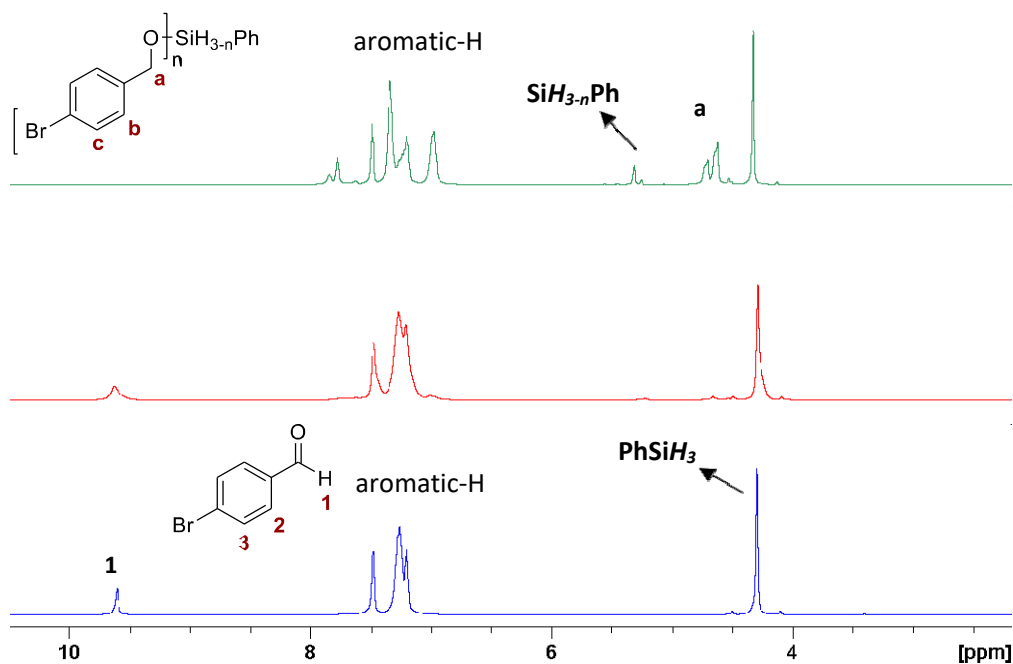

Figure S2.  $^1\text{H}$  NMR of the reaction of *p*-Br benzaldehyde with  $\text{PhSiH}_3$  (Table 2, entry 2)

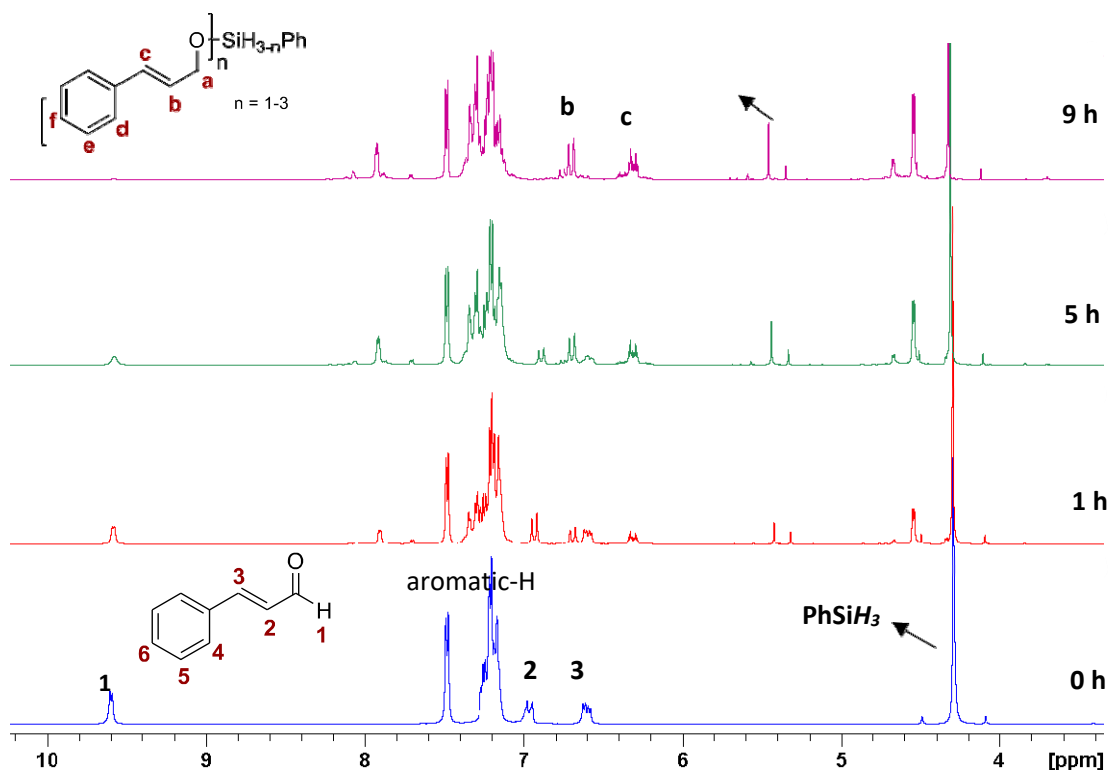

Figure S3.  $^1\text{H}$  NMR of the reaction of cinnamaldehyde with  $\text{PhSiH}_3$  (Table 2, entry 10)

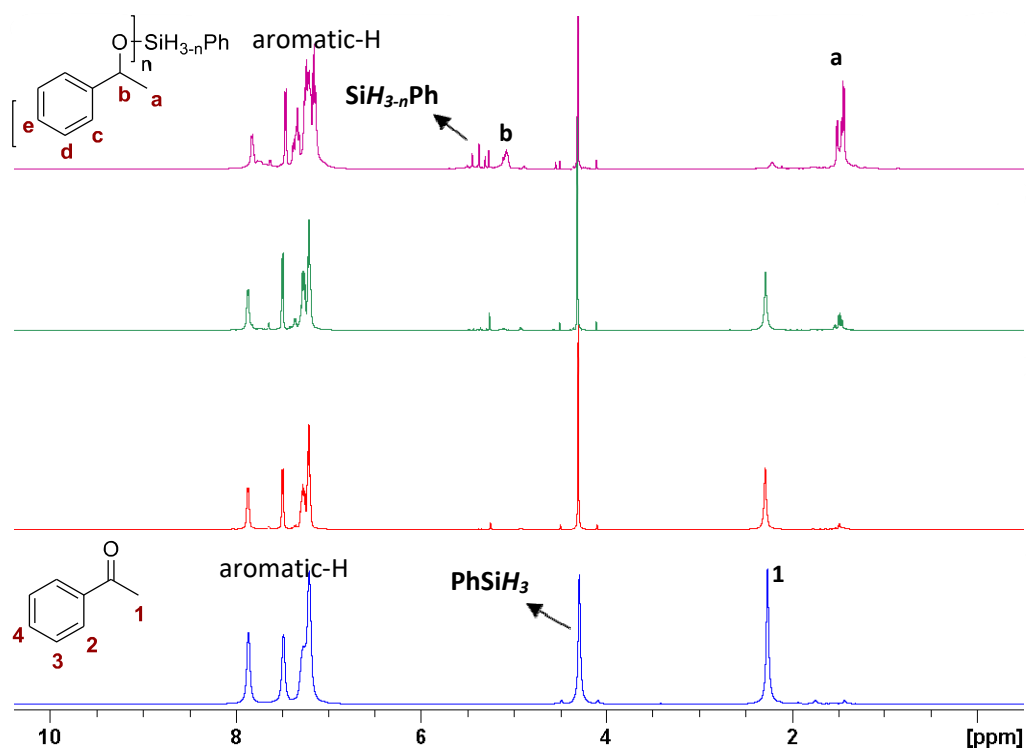

Figure S4.  $^1\text{H}$  NMR of the reaction of acetophenone with  $\text{PhSiH}_3$  (Table 2, entry 5)

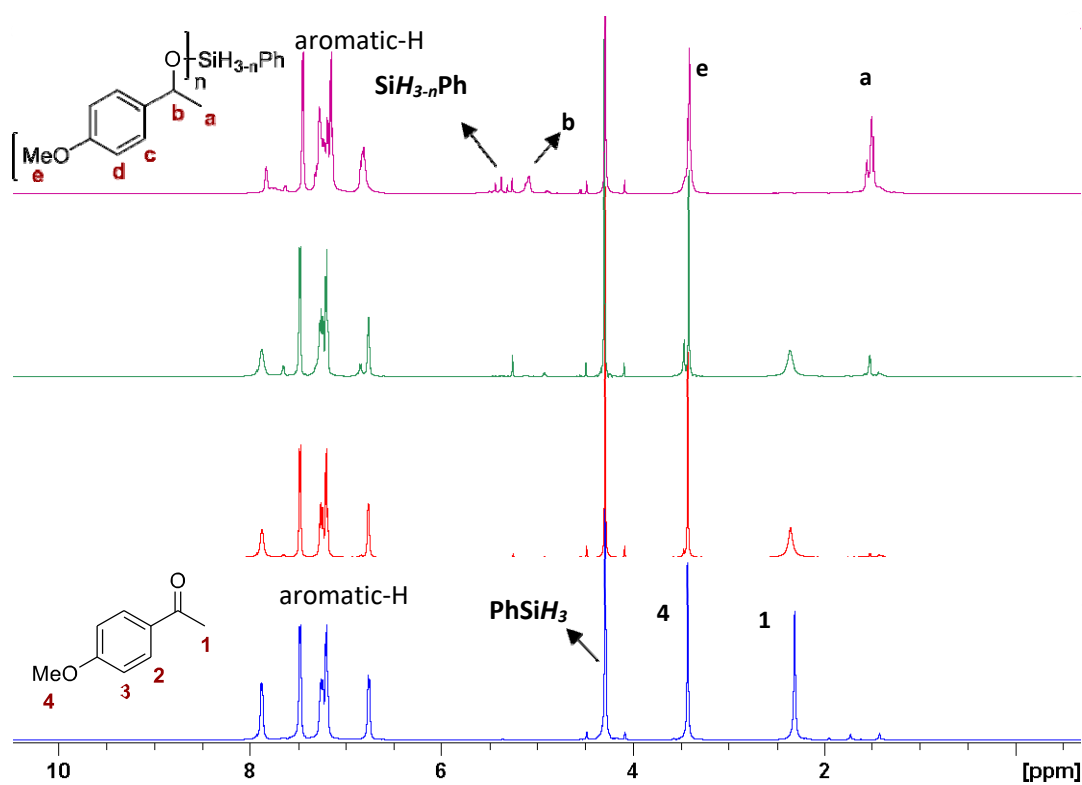

Figure S5.  $^1\text{H}$  NMR of the reaction of *p*-MeO acetophenone with  $\text{PhSiH}_3$  (Table 2, entry 7)

**3. Table S1: Comparison of Catalytic Activity of Selective Mn Complexes in Scheme 1**

|    | Substrate | Silane<br>(equiv)                      | Cat<br>(mol%)   | Temp<br>°C | Solvent            | Time   | Convsn | activation           | Ref       |
|----|-----------|----------------------------------------|-----------------|------------|--------------------|--------|--------|----------------------|-----------|
| 1  | PhCHO     | Ph <sub>2</sub> SiH <sub>2</sub> (1.5) | <b>A</b> (1)    | 25         | Toluene            | 1 h    | 97%    | hν(350nm)            | 65        |
| 2  | NaphCOMe  | Ph <sub>2</sub> SiH <sub>2</sub> (1.0) | <b>B</b> (0.5)  | 25         | Toluene            | 24 h   | 98%    | hν(350nm)            | 70        |
| 3  | PhCHO     | PhSiH <sub>3</sub> (1.2)               | <b>C</b> (1)    | 80         | Benzene            | 16 h   | 98%    |                      | 57        |
| 4  | PhCOMe    | PhSiH <sub>3</sub> (1.2)               | <b>C</b> (1)    | 80         | CH <sub>3</sub> CN | 5 h    | 97%    |                      | 57        |
| 5  | PhCHO     | PhSiH <sub>3</sub> (1.0)               | <b>D</b> (1)    | 25         | Benzene            | 4 h    | 90%    |                      | 62        |
| 6  | PhCOMe    | PhSiH <sub>3</sub> (1.0)               | <b>D</b> (1)    | 25         | Benzene            | 4 h    | 90%    |                      | 62        |
| 7  | PhCOMe    | PhSiH <sub>3</sub> (1.0)               | <b>E</b> (1)    | 25         | Benzene            | 4 min  | >99%   |                      | 66        |
| 8  | PhCOMe    | PhSiH <sub>3</sub> (1.0)               | <b>F</b> (1)    | 25         | Toluene            | 12 h   | 68%    | NaBEt <sub>3</sub> H | 63        |
| 9  | PhCHO     | PhSiH <sub>3</sub> (0.5)               | <b>G</b> (0.5)  | 80         | CH <sub>3</sub> CN | 20 min | 98%    |                      | 68        |
| 10 | PhCOMe    | PhSiH <sub>3</sub> (0.5)               | <b>G</b> (0.5)  | 80         | CH <sub>3</sub> CN | 2 h    | 98%    |                      | 68        |
| 11 | PhCHO     | PhSiH <sub>3</sub> (1.0)               | <b>5b</b> (0.5) | 120        | Benzene            | 40 min | >99%   |                      | this work |
| 12 | PhCOMe    | PhSiH <sub>3</sub> (1.0)               | <b>5b</b> (0.5) | 120        | Benzene            | 41 h   | 93%    |                      | this work |

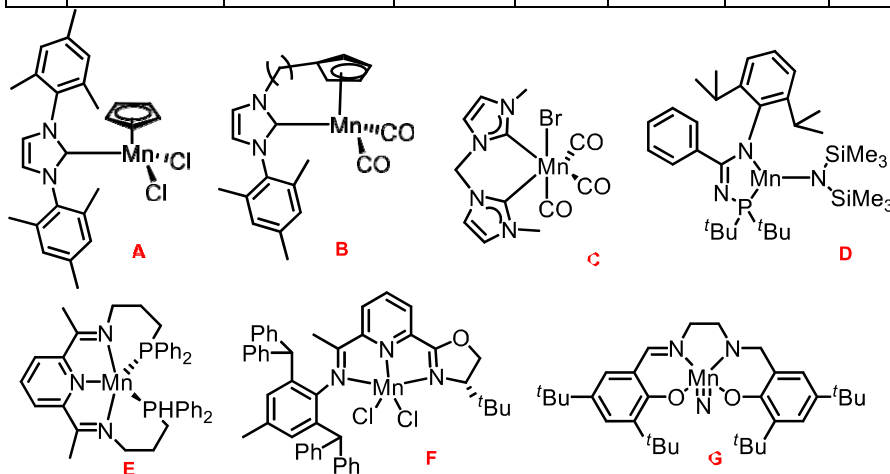

#### 4. References

76. Darensbourg, D.J.; Ulusoy, M.; Karroonnirum, O.; Poland, R.R.; Reibenspies, J.H.; Cetinkaya, B. Highly selective and reactive (salan) CrCl catalyst for the copolymerization and block copolymerization of epoxides with carbon dioxide. *Macromolecules* **2009**, *42*, 6992–6998.
77. Balsells, J.; Carroll, J.P.; Walsh, P.J. Achiral Tetrahydrosalen Ligands for the Synthesis of C2-Symmetric Titanium Complexes: A Structure and Diastereoselectivity Study. *Inorg. Chem.* **2001**, *40*, 5568–5574.
88. Darensbourg, D. J.; Mackiewicz, R. M.; Rodgers, J. L.; Fang, C. C.; Billodeaux, D. R.; Reibenspies, J. H. Cyclohexene oxide/CO<sub>2</sub> copolymerization catalyzed by chromium (III) salen complexes and N-methylimidazole: effects of varying salen ligand substituents and relative cocatalyst loading. *Inorg. Chem.* **2004**, *43*, 6024–6034.
89. Jakhar, V. K.; Barman, M. K.; Nembenna, S. Aluminum monohydride catalyzed selective hydroboration of carbonyl compounds. *Org. Lett.* **2016**, *18*, 4710–4713.
90. Zeng, H.; Wu, J.; Li, S.; Hui, C.; Ta, A.; Cheng, S. Y.; Zheng, S.; Zhang, G. Copper (II)-Catalyzed Selective Hydroboration of Ketones and Aldehydes. *Org. Lett.* **2019**, *21*, 401–406.
91. Qi, X.; Zheng, T.; Zhou, J.; Dong, Y.; Zuo, X.; Li, X.; Sun, H.; Fuhr, O.; Fenske, D. Synthesis and Catalytic Activity of Iron Hydride Ligated with Bidentate N-Heterocyclic Silylenes for Hydroboration of Carbonyl Compounds. *Organometallics* **2019**, *38*, 268–277.
92. Clarke, Z. E.; Maragh, P. T.; Dasgupta, T. P.; Gusev, D. G.; Lough, A. J.; Abdur-Rashid, K. A family of active iridium catalysts for transfer hydrogenation of ketones. *Organometallics* **2006**, *25*, 4113–4117.
